# Supplementary material
Source: PubMed Central journal article supplement (PMC2156038)
Supplement: NIHMS35157-supplement-01.pdf [file NIHMS35157-supplement-01.pdf]

## Supplemental Data

## Structural Basis and Mechanism of Autoregulation

## in 3-Phosphoinositide-Dependent Grp1 Family

## Arf GTPase Exchange Factors

Jonathan P. DiNitto, Anna Delprato, Meng-Tse Gabe Lee, Thomas C. Cronin, Shaohui Huang, Adilson Guilherme, Michael P. Czech, and David G. Lambright

Table S1. Catalytic Efficiency of Grp1 Family Constructs and Complexes

| $\Delta N17Arf1$                       |                       |                                        |                            |
|----------------------------------------|-----------------------|----------------------------------------|----------------------------|
| Protein                                | Construct             | $k_{cat}/K_m$ ( $10^4 M^{-1} s^{-1}$ ) | $k_{cat}/K_m$ (Arb. Units) |
| Grp1                                   | Sec7                  | $8.0 \pm 1.3$                          | $78 \pm 12$                |
|                                        | Sec7-PH               | $7.6 \pm 0.43$                         | $74 \pm 4.1$               |
|                                        | Sec7-PH-pb            | $0.1 \pm 0.003$                        | $1.0 \pm 0.1$              |
|                                        | hr-Sec7-PH            | $4.7 \pm 0.57$                         | $45 \pm 5.5$               |
|                                        | hr-Sec7-PH-pb         | $0.25 \pm 0.093$                       | $2.4 \pm 0.9$              |
| ARNO                                   | Sec7                  | $33 \pm 1.4$                           | $230 \pm 9.7$              |
|                                        | Sec7-PH               | $16 \pm 0.72$                          | $110 \pm 4.9$              |
|                                        | Sec7-PH-pb            | $0.15 \pm 0.004$                       | $1.0 \pm 0.1$              |
|                                        | hr-Sec7-PH            | $2.3 \pm 0.06$                         | $16 \pm 0.4$               |
|                                        | hr-Sec7-PH-pb         | $0.082 \pm 0.004$                      | $0.56 \pm 0.1$             |
| Cytohesin-1                            | Sec7                  | $18 \pm 0.78$                          | $89 \pm 3.8$               |
|                                        | Sec7-PH               | $14 \pm 0.91$                          | $73 \pm 4.4$               |
|                                        | Sec7-PH-pb            | $0.2 \pm 0.01$                         | $1.0 \pm 0.1$              |
|                                        | hr-Sec7-PH            | $3.2 \pm 0.06$                         | $16 \pm 0.3$               |
|                                        | hr-Sec7-PH-pb         | $0.061 \pm 0.024$                      | $0.3 \pm 0.1$              |
| Grp1-Grsp1 complex (-IP <sub>4</sub> ) | hr-Sec7-PH/FERM-hr    | $3.5 \pm 0.41$                         | $36 \pm 4.2$               |
|                                        | hr-Sec7-PH-pb/FERM-hr | $0.098 \pm 0.030$                      | $1.0 \pm 0.1$              |
| Grp1-Grsp1 complex (+IP <sub>4</sub> ) | hr-Sec7-PH/FERM-hr    | $5.0 \pm 0.30$                         | $11 \pm 3.0$               |
|                                        | hr-Sec7-PH-pb/FERM-hr | $0.47 \pm 0.038$                       | $1.0 \pm 0.1$              |
| $\Delta N12Arf6$                       |                       |                                        |                            |
| Grp1                                   | Sec7                  | $0.28 \pm 0.029$                       | $24 \pm 2.5$               |
|                                        | Sec7-PH               | $0.64 \pm 0.025$                       | $54 \pm 2.1$               |
|                                        | Sec7-PH-pb            | $0.012 \pm 0.001$                      | $1.0 \pm 0.1$              |
|                                        | hr-Sec7-PH            | $0.7 \pm 0.029$                        | $60 \pm 2.4$               |
|                                        | hr-Sec7-PH-pb         | $0.013 \pm 0.001$                      | $1.1 \pm 0.1$              |
| ARNO                                   | Sec7                  | $6 \pm 0.19$                           | $32 \pm 1.0$               |

|                                             |                       |                   |               |
|---------------------------------------------|-----------------------|-------------------|---------------|
|                                             | Sec7-PH               | $4.2 \pm 0.07$    | $22 \pm 3.8$  |
|                                             | Sec7-PH-pb            | $0.19 \pm 0.015$  | $1.0 \pm 0.1$ |
|                                             | hr-Sec7-PH            | $1.2 \pm 0.099$   | $6.5 \pm 0.5$ |
|                                             | hr-Sec7-PH-pb         | $0.073 \pm 0.008$ | $0.4 \pm 0.1$ |
| <b>Cytohesin-1</b>                          | Sec7                  | $3 \pm 0.46$      | $32 \pm 4.8$  |
|                                             | Sec7-PH               | $3.2 \pm 0.11$    | $34 \pm 1.2$  |
|                                             | Sec7-PH-pb            | $0.095 \pm 0.005$ | $1.0 \pm 0.1$ |
|                                             | hr-Sec7-PH            | $0.95 \pm 0.035$  | $10 \pm 0.3$  |
|                                             | hr-Sec7-PH-pb         | $0.032 \pm 0.003$ | $0.3 \pm 0.1$ |
| <b>Grp1-Grsp1 complex (-IP<sub>4</sub>)</b> | hr-Sec7-PH/FERM-hr    | $0.43 \pm 0.002$  | $12 \pm 0.1$  |
|                                             | hr-Sec7-PH-pb/FERM-hr | $0.036 \pm 0.003$ | $1.0 \pm 0.1$ |
| <b>Grp1-Grsp1 complex (+IP<sub>4</sub>)</b> | hr-Sec7-PH/FERM-hr    | $0.49 \pm 0.005$  | $14 \pm 0.1$  |
|                                             | hr-Sec7-PH-pb/FERM-hr | $0.036 \pm 0.001$ | $1.0 \pm 0.1$ |

hr, heptad repeats; Sec7, Sec7 domain; PH, Pleckstrin homology domain; pb, polybasic region; IP<sub>4</sub>, Ins(1,3,4,5)P<sub>4</sub>.

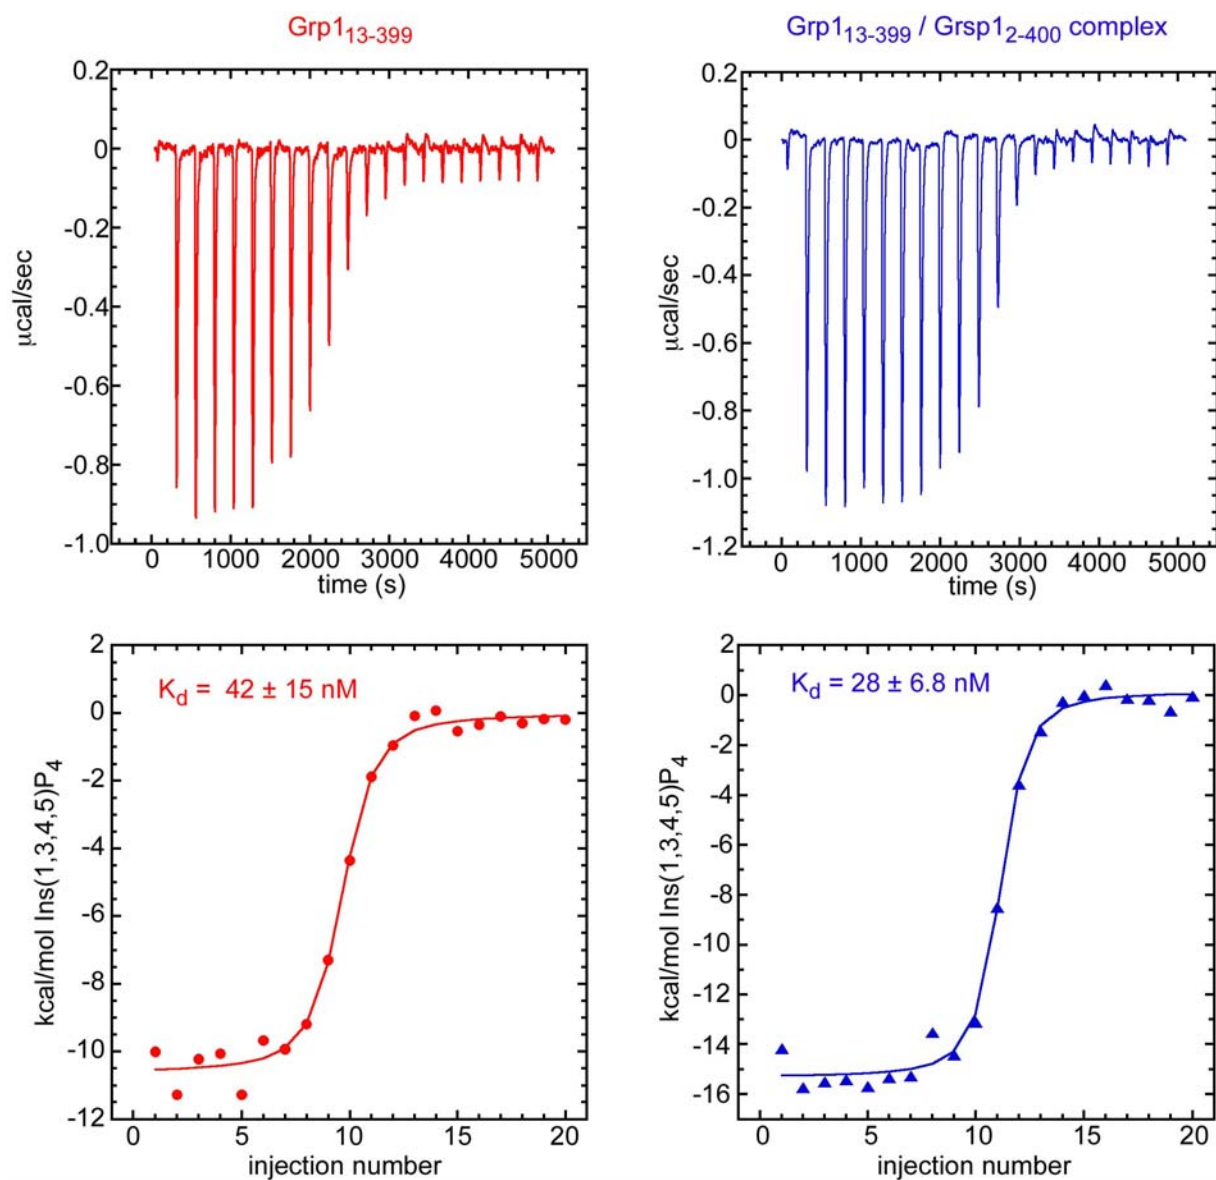

**Figure S1. Affinity of Ins(1,3,4,5)P<sub>4</sub> for Grp1 and the Grp1-Grsp1 Complex Analyzed by Isothermal Titration Microcalorimetry**

Samples of Grp1<sub>13-399</sub> (10 μM) or the Grp1<sub>13-399</sub>-Grsp1<sub>2-400</sub> complex (10 μM) were titrated with Ins(1,3,4,5)P<sub>4</sub>. Raw data were corrected for baseline drift and the total heat released during each injection determined by integrating over the injection period. Dissociation constants ( $K_d$ ) were determined by fitting to a 1:1 binding model as described in Cronin et al. (2004) *EMBO J.* **23**: 3711-3720.

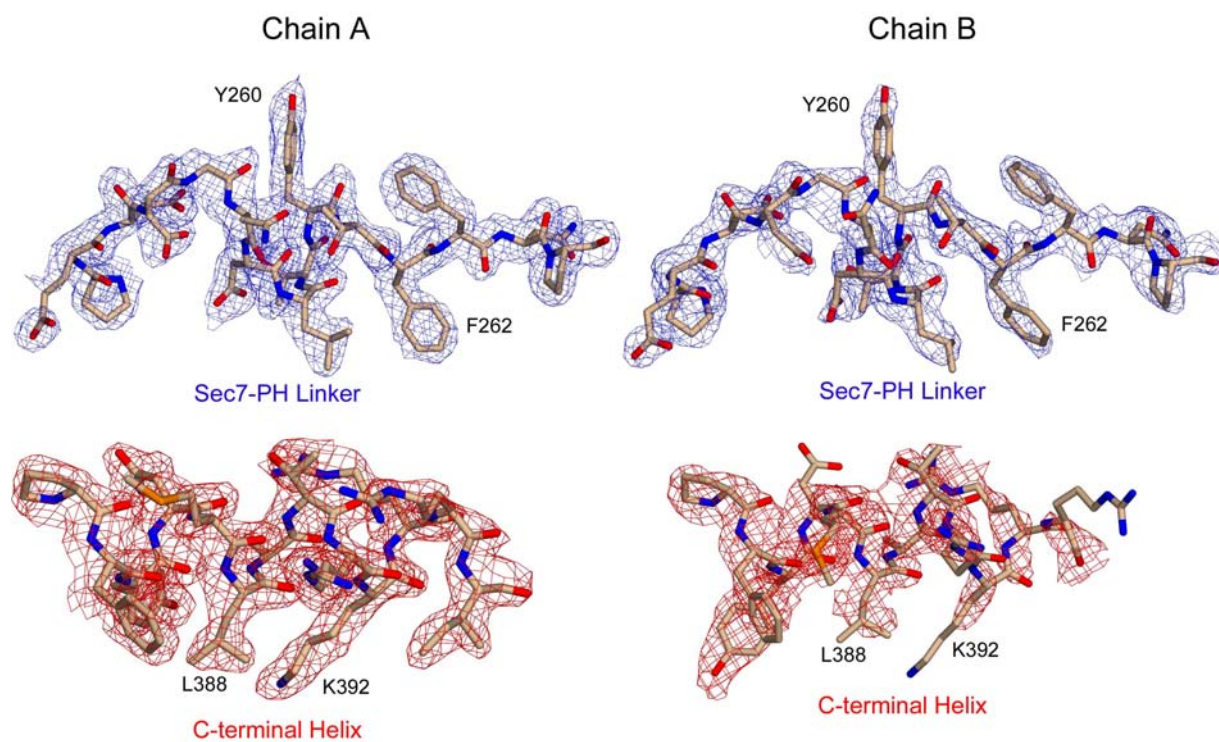

**Figure S2. Experimental Electron Density for Functionally Relevant Regions of the Grp1<sub>63-399</sub> K68A/H260Y Mutant**

$\sigma_A$  weighted  $2wF_o - DF_c$  maps were calculated with phases derived from a 3 wavelength MAD experiment and improved by solvent flipping. The maps include data from 20-1.95 Å and are contoured at 1.0  $\sigma$ .

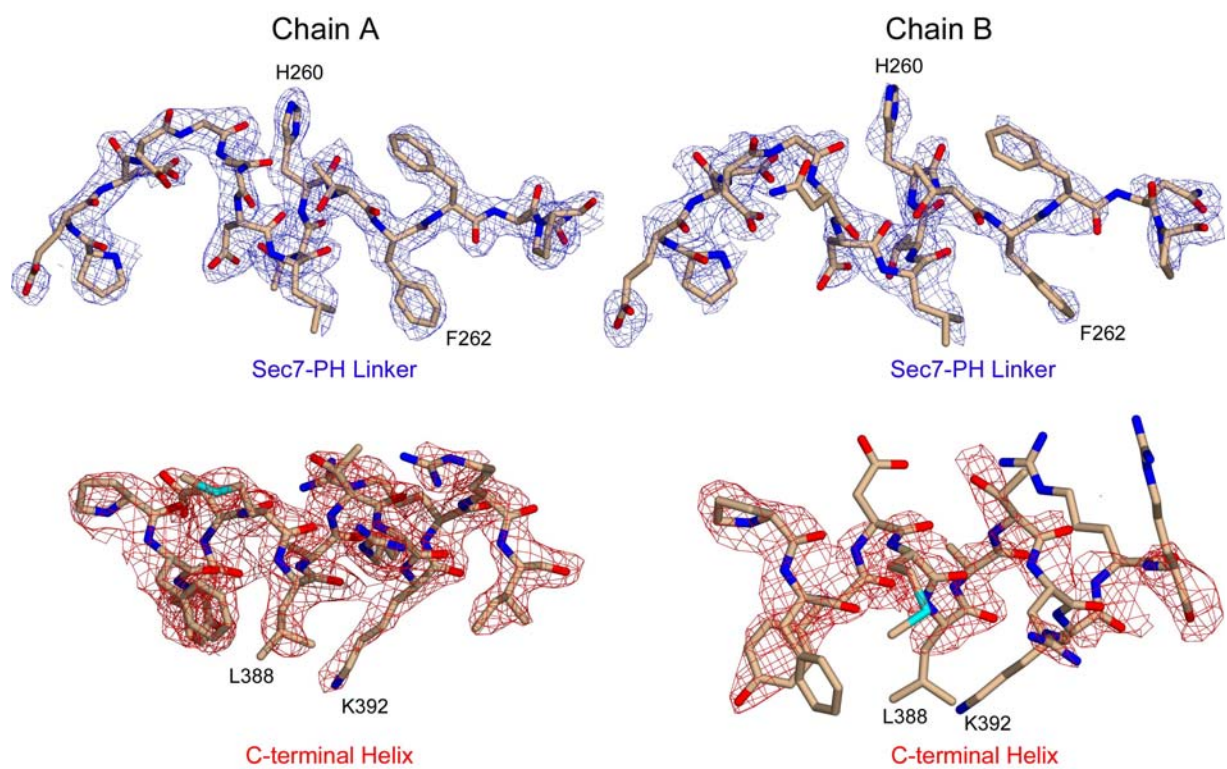

**Figure S3. Simulated Annealing Omit Maps for Functionally Relevant Regions of the Grp1<sub>63-399</sub> K68A Mutant**

The final refined model is shown with the electron density from  $\sigma_A$  weighted  $2F_o - F_c$  maps following simulated annealing with the linker or C-terminal helix omitted. Maps include data from 20.0-2.0 Å and are contoured at 1.0  $\sigma$ .

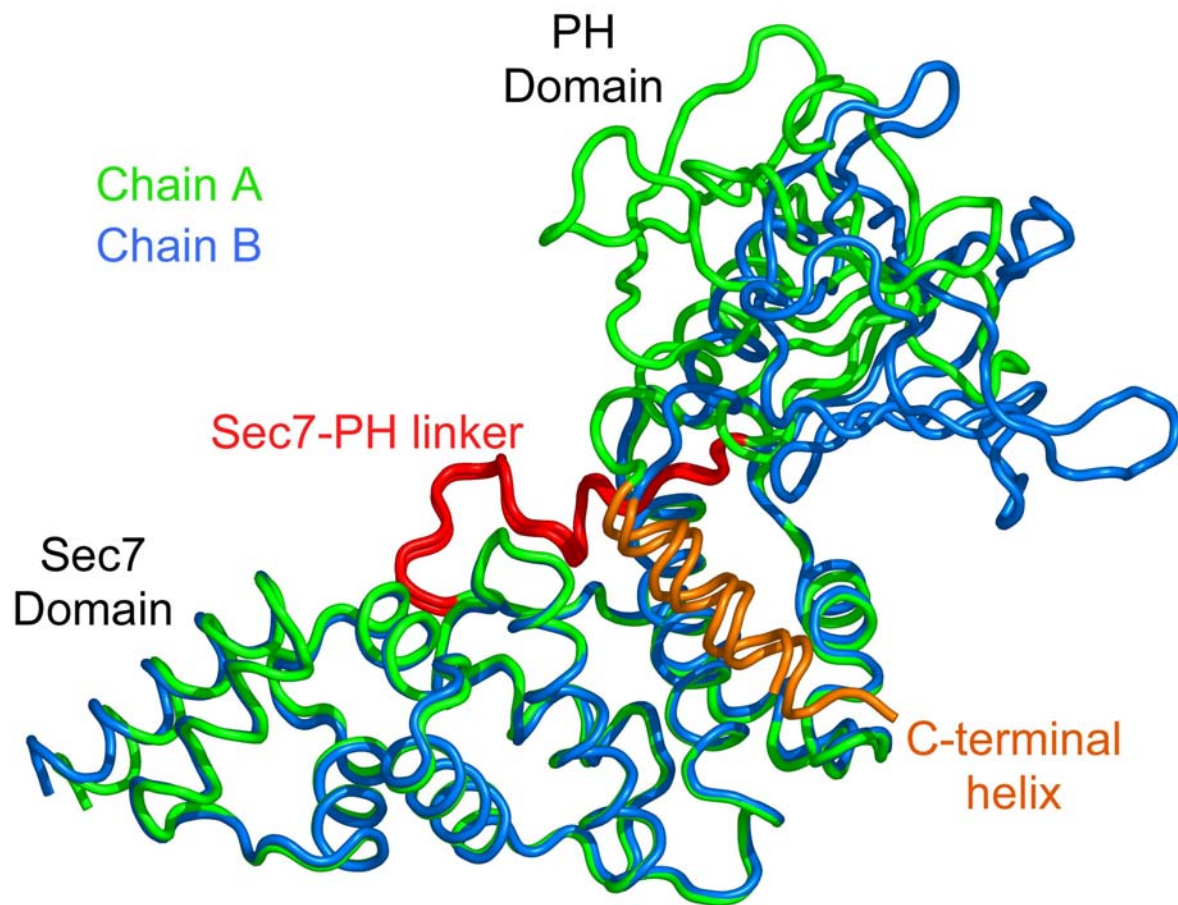

**Figure S4. Comparison of the Two Molecules in the Asymmetric Unit Following Superposition of the Sec7 Domains**

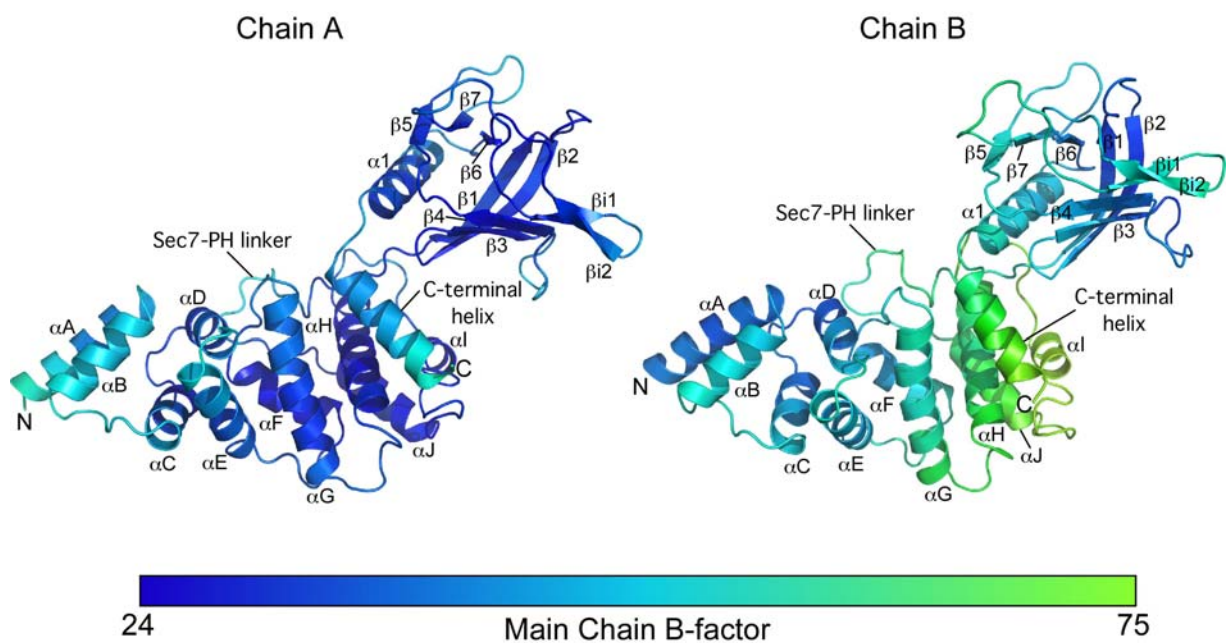

**Figure S5. B Factors for Main-Chain Atoms of Molecule A and B in the Asymmetric Unit for Native Crystals of Grp1<sub>63-399</sub>**

The view and orientation is similar to Figure 2. B-factors from the main chain atoms of the refined structure are mapped to the ribbon representation with color gradient proportional to the B-factor. The overall B-factor is higher in chain B than in chain A. The figure was generated with PyMol (Delano Scientific).

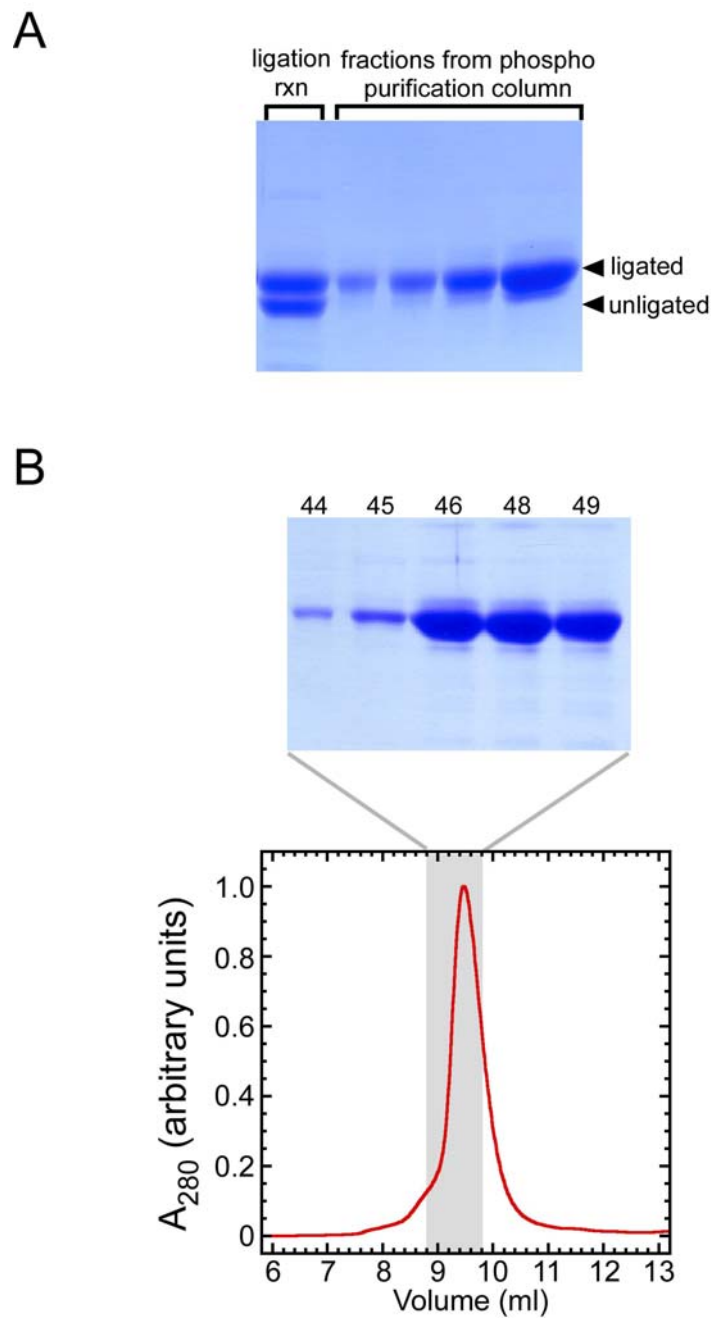

**Figure S6. Purification of Phosphorylated Cytohesin-1 R378C Following Intein-Mediated Ligation**

(A) SDS-PAGE gel of fractions from a phosphopurification column (Qiagen).

(B) Elution profile from Superdex-75 column. Shown above the elution profile are fractions analyzed by SDS-PAGE.



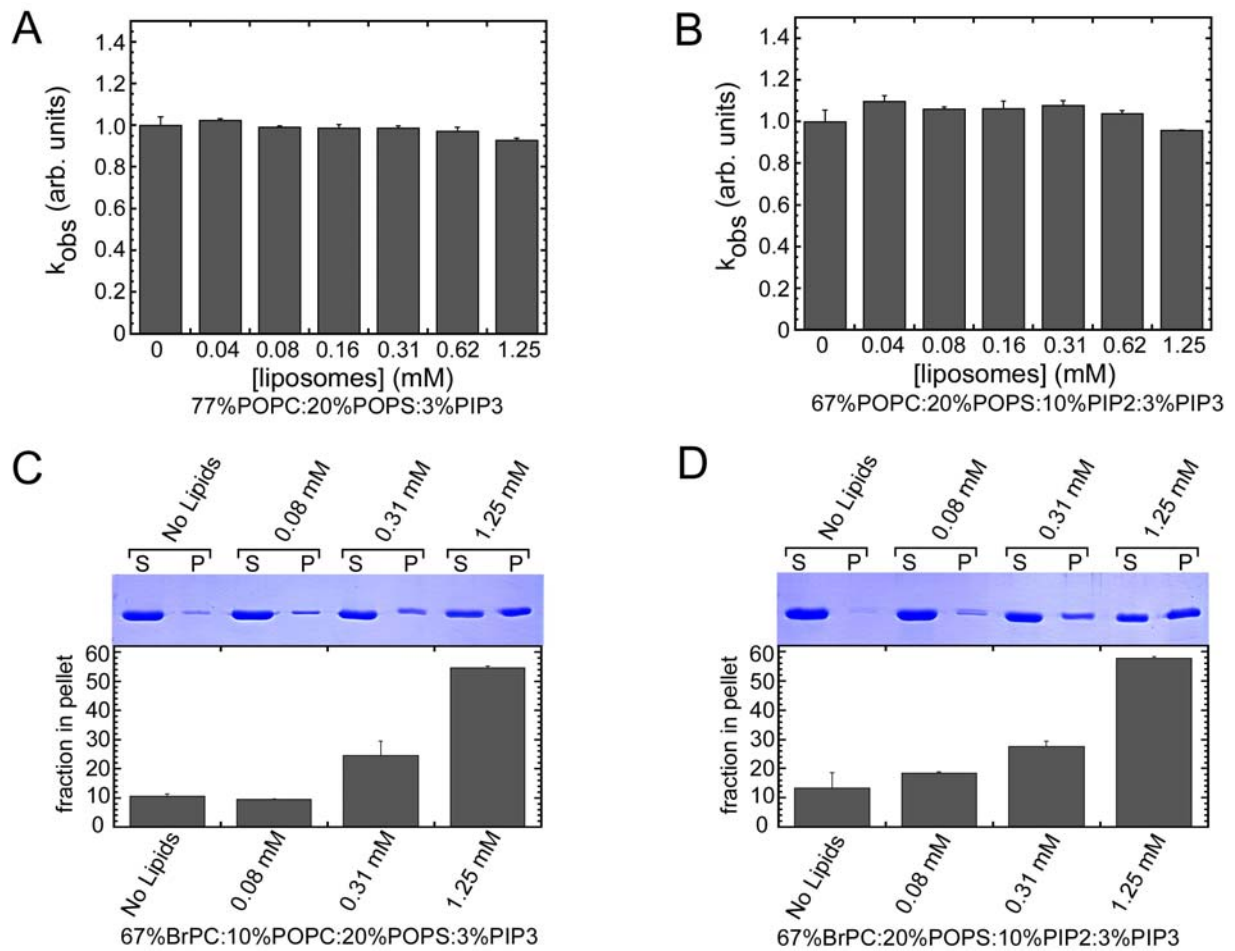

**Figure S7. Effect of Liposomes on the  $\Delta N12Arf6$  Exchange Activity of Grp1<sub>63-399</sub>**

(A and B) The catalytic activity of autoinhibited Grp1<sub>63-399</sub> (2  $\mu$ M) was measured as a function of liposome concentration.

(C and D) Co-sedimentation of Grp1<sub>63-399</sub> with liposomes under the same conditions as in panels A and B. SDS-PAGE gels were quantified using GelEval 1.1. Plots below the gels represent the mean and deviation of the background corrected integrated band intensity for 2 independent determinations.

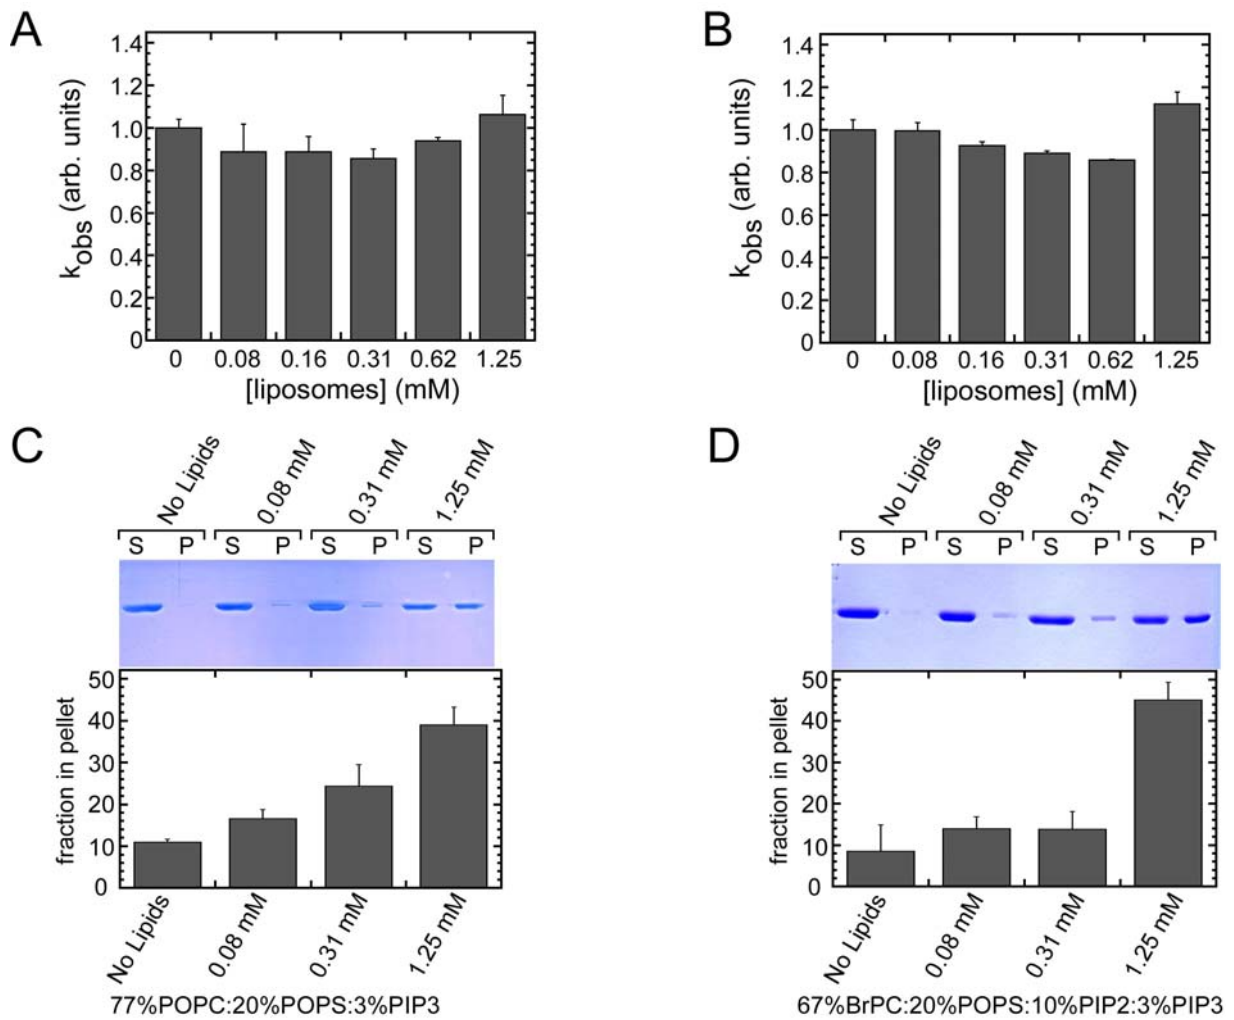

**Figure S8. Effect of Liposomes on the  $\Delta N12Arf6$  Exchange Activity of Cytohesin-1<sub>53-398</sub>**

(A and B) Catalytic activity of autoinhibited Cytohesin-1<sub>53-398</sub> (2  $\mu$ M) as a function of liposome concentration.

(C and D) Co-sedimentation of Cytohesin-1<sub>53-398</sub> with liposomes under the same conditions as in panels A and B. SDS-PAGE gels were quantified using GeEval 1.1. Plots below the gels represent the mean and deviation of the background corrected integrated band intensity for 2 independent determinations.

## **Experimental Procedures for Figures S7 and S8**

### **Exchange Assays for Liposome Partitioning Experiments**

The kinetics of nucleotide exchange were monitored using the decrease in fluorescence accompanying release of mant-GDP from Arf GTPases. Exchange reactions were initiated by the addition of mant-GDP loaded  $\Delta$ N17Arf1 or  $\Delta$ N12Arf6 (1  $\mu$ M unless otherwise indicated) and varying concentrations of exchange factor in the presence of 250  $\mu$ M GppNHp. Data were collected using a Sapphire multimode microplate spectrophotometer (Tecan). Samples were excited at 360 nm and the emission detected at 440 nm. Observed pseudo first order rate constants ( $k_{\text{obs}}$ ) were extracted from a nonlinear least-squares fit to the exponential function

$$I(t) = (I_0 - I_\infty) \exp(-k_{\text{obs}} t) + I_\infty$$

where  $I(t)$  is the emission intensity as a function of time and  $I_0$  and  $I_\infty$  are the initial and final emission intensities, respectively. The catalytic efficiency,  $k_{\text{cat}}/K_m$ , was obtained from the slope of a linear least squares fit to

$$k_{\text{obs}} = (k_{\text{cat}}/K_m) [\text{Sec7}] + k_{\text{intr}}$$

where  $k_{\text{intr}}$  is the intrinsic rate constant for mant-GDP release.

### **Liposome Partitioning**

Phospholipids (Avanti) and phosphoinositides (Cell Signals) were dissolved in chloroform, mixed in the desired molar ratios using a Drummond pipettor, dried by evaporation, and rehydrated in 50 mM Tris, pH 8.0, 150 mM KCl, 1 mM MgCl<sub>2</sub>. Small unilamellar vesicles (SUVs) were prepared by rapid freeze-thaw cycling in liquid nitrogen (10 cycles) followed by bath sonication for 30 minutes. Proteins were added to a final concentration of 2  $\mu$ M and the resulting mixtures incubated for 1 hour at 25°C followed by centrifugation at 100,000 g for 1 hr at 25°C. Pellets were redissolved in an equivalent volume. Samples were analyzed by SDS-PAGE with Coomassie Blue staining and quantified using the GelEval 1.1.
